# Supplementary material for: Supramolecular assembly-induced electrochemiluminescence enhancement of gold nanoclusters for hemoglobin detection
Source: Royal Society of Chemistry journal article supplement (doi:10.1039/d3tb02892e), 2024-01-01
Supplement: d3tb02892e1.pdf [file d3tb02892e1.pdf]

## Supporting Information

### Supramolecular Assembly-induced Electrochemiluminescence

#### Enhancement of Gold Nanoclusters for Hemoglobin Detection

Xue Ge<sup>a†</sup>, Mingming Zhang<sup>b†</sup>, Fei Yin<sup>a</sup>, Qian Sun<sup>a</sup>, Fan Mo<sup>a</sup>, Xinzhou Huang<sup>a</sup>, Ying Zheng<sup>a</sup>, Guoqiu Wu<sup>b,c</sup>, Yuanjian Zhang<sup>a</sup>, and Yanfei Shen<sup>a,b,c\*</sup>

<sup>a</sup> *Medical School, School of Chemistry and Chemical Engineering, Southeast University, Nanjing 210009, China.*

<sup>b</sup> *Center of Clinical Laboratory Medicine, Zhongda Hospital, Southeast University, Nanjing 210009, China.*

<sup>c</sup> *Jiangsu Provincial Key Laboratory of Critical Care Medicine, Southeast University, Nanjing 210009, China.*

<sup>†</sup> *X.G. and M.Z. contributed equally.*

Email: Yanfei.Shen@seu.edu.cn

## Table of contents

|                                             |    |
|---------------------------------------------|----|
| Materials and reagents .....                | 3  |
| Apparatus .....                             | 3  |
| The calculation of the ECL efficiency ..... | 3  |
| Figure S1 .....                             | 5  |
| Figure S2 .....                             | 6  |
| Figure S3 .....                             | 7  |
| Figure S4 .....                             | 8  |
| Figure S5 .....                             | 8  |
| Figure S6 .....                             | 9  |
| Figure S7 .....                             | 10 |
| Figure S8 .....                             | 10 |
| References .....                            | 11 |

## Materials and reagents

Hemoglobin (Hb), potassium chloride (KCl) and fructose were obtained from Aladdin Chemical Co., Ltd. (Shanghai, China). 4-hydroxy-2-mercapto-6-methylpyrimidine (MTU), L-arginine (Arg), and guanidine (Gua), ferroheme (heme), uric acid (UA), alanine and glutamic acid were purchased from Macklin Biochemical Co., Ltd. (Shanghai, China). Sodium hydroxide (NaOH), ascorbic acid (AA) and isopropyl alcohol were purchased from Sinopharm Chemical Reagent Co., Ltd. (Shanghai, China). Gold (III) chloride trihydrate ( $\text{HAuCl}_4 \cdot 3\text{H}_2\text{O}$ ) and triethylamine (TEA) were purchased from Sigma-Aldrich (USA). Phosphate-buffered saline (PBS), sodium chloride (NaCl) and glucose were purchased from Sangon Biotech (Shanghai, China). Ultrapure water was obtained from a Millipore water purification system (18.2  $\text{M}\Omega \cdot \text{cm}$ ). All reagents were of analytical grade and not further purified.

## Apparatus

Transmission electron microscopy (TEM) were performed on Talos F200X G2, (FEI, USA). The X-ray photoelectron spectrometer (XPS) were recorded through an ESCALAB 250XI (Thermo, USA). Electrochemiluminescence (ECL) spectra were measured with a Fluoromax-4 fluorescence spectrometer (Horiba, Japan). UV-vis absorption spectra were recorded on Cary 100 UV-vis spectrophotometer (Agilent, USA). The cyclic voltammogram (CV) curves were recorded on a CHI660E electrochemistry workstation (CHI China). ECL measurements were performed through MPI-EII ECL analyzer system (Xi'an Remex, China). All the electrochemical experiments were performed with conventional three-electrode system, where the glassy carbon electrode (GCE,  $d = 3 \text{ mm}$ ) was used as working electrode, Pt electrode was used as the counter electrode and Ag/AgCl electrode was used as the reference electrode.

## The calculation of the ECL efficiency

The ECL efficiency ( $\Phi_{\text{ECL}}$ ) was measured according to the reported method, and  $\text{Ru}(\text{bpy})_3^{2+}$  was used as the reference.<sup>1,2</sup> The equation was calculated as follows, where

x represented the Au NCs and st represented Ru(bpy)<sub>3</sub><sup>2+</sup>. The  $\Phi_{ECL}$  of MTU-Au NCs and Arg/ MTU-Au NCs were measured in 0.01M PBS (pH 7.4) containing 200 mM TEA with 0.03 mg mL<sup>-1</sup> MTU-Au NCs and 0.03 mg mL<sup>-1</sup> Arg/MTU-Au NCs, respectively.  $\Phi_{ECL}$  of Ru(bpy)<sub>3</sub><sup>2+</sup> were measured in 0.01M PBS (pH 7.4) containing 200 mM TEA and 10  $\mu$ M Ru(bpy)<sub>3</sub><sup>2+</sup>.

$$\Phi_{ECL} = \frac{\left(\frac{\int ECL dt}{\int current dt}\right)_x}{\left(\frac{\int ECL dt}{\int current dt}\right)_{st}} \times 100\%$$

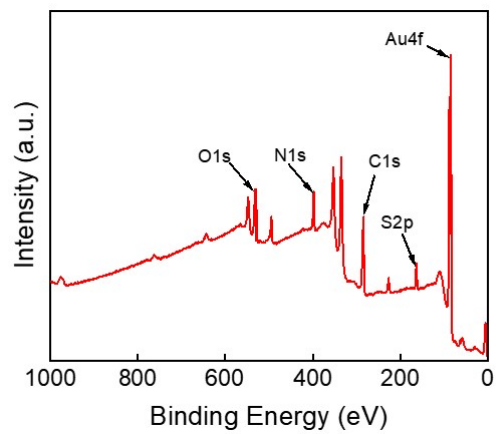

**Figure S1.** XPS survey spectrum of Arg/MTU-Au NCs.

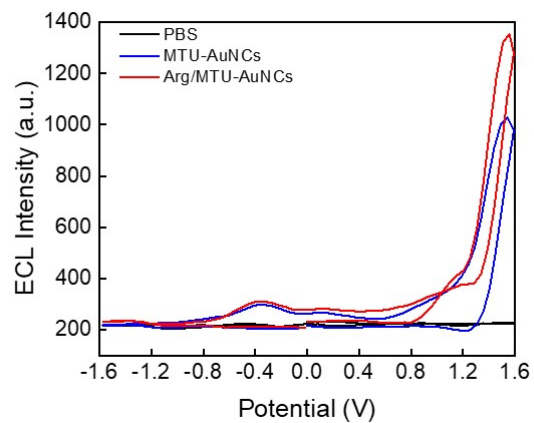

**Figure S2.** ECL-potential profiles of bare GCE in 0.01 M PBS (pH 7.4), and 0.01 M PBS (pH 7.4) containing MTU-Au NCs, and Arg/MTU-Au NCs. Scan rate: 0.5 V/s. The photomultiplier tube (PMT) was biased at 750 V.

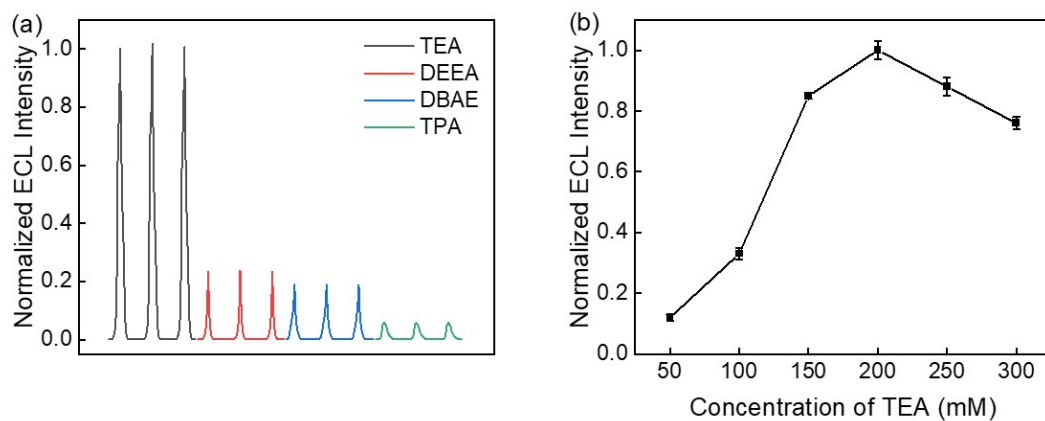

**Figure S3.** (a) Normalized ECL intensity of Arg/MTU-Au NCs with different coreactants. (b) Normalized ECL intensity of Arg/MTU-Au NCs with different concentrations of TEA as coreactant.

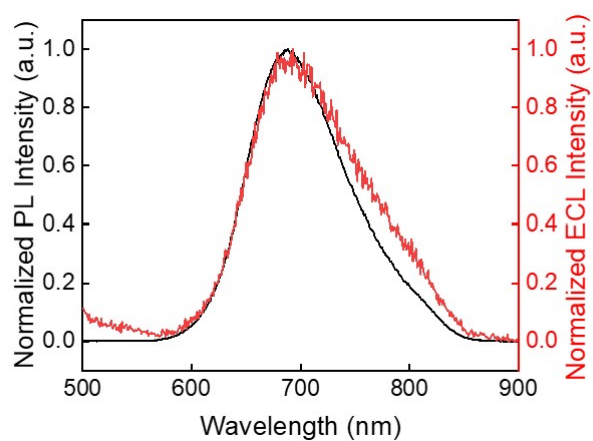

**Figure S4.** Normalized PL (black) and ECL (red) emission spectra.



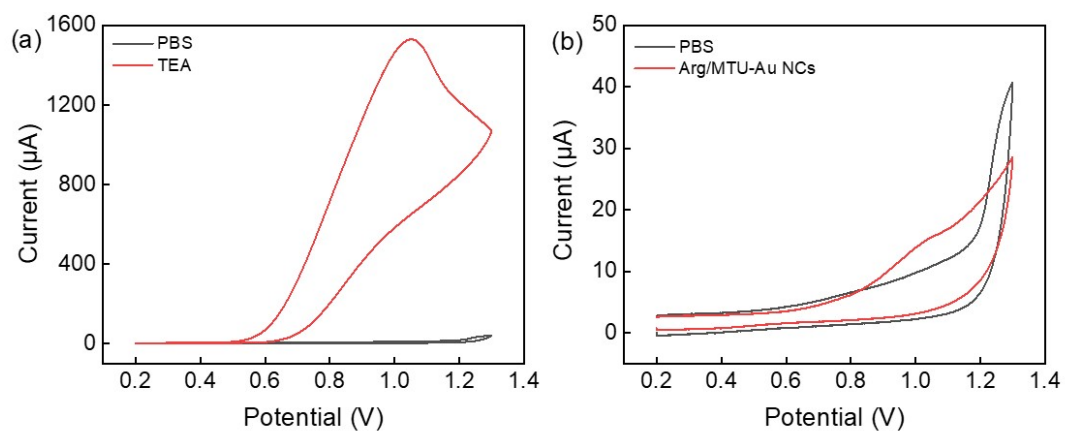

**Figure S5.** (a) CV curves of GCE in 0.01 M PBS (pH 7.4) and 0.01 M PBS (pH 7.4) containing TEA. (b) CV curves of GCE in 0.01 M PBS (pH 7.4) and 0.01 M PBS (pH 7.4) containing Arg/MTU-Au NCs.

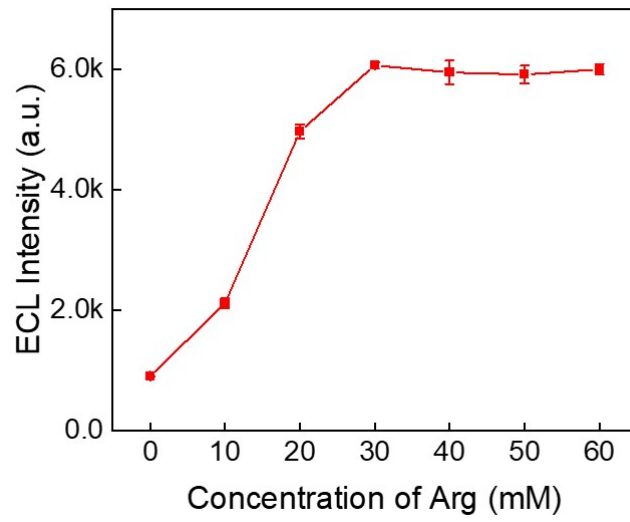

**Figure S6.** The ECL intensity of Arg/MTU-Au NCs by using different concentrations of Arg for the preparation of Arg/MTU-Au NCs.

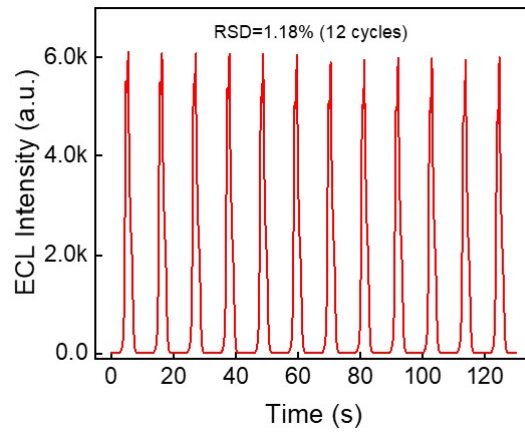

**Figure S7.** ECL signals of Arg/MTU-Au NCs upon successive scanning for 12 cycles.

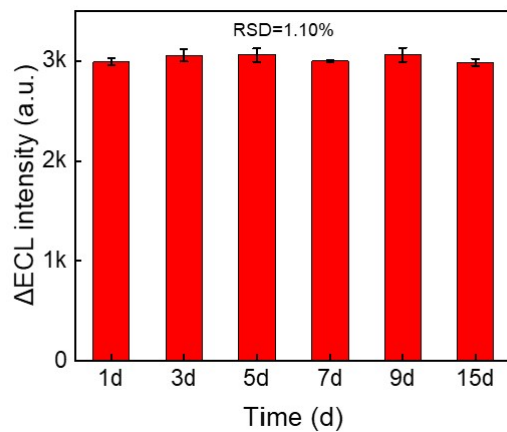

**Figure S8.** The signal stability of the biosensing platform for the detection of Hb after a storage of 1, 3, 5, 7, 9 and 15 days.

## References

1. D. Pan, Z. Fang, E. Yang, Z. Ning, Q. Zhou, K. Chen, Y. Zheng, Y. Zhang and Y. Shen, *Angew. Chem. Int. Ed.*, 2020, **59**, 16747-16754.
2. M. Sun, J. Liu, Y. Zhou, J. Zhang, Y. Chai, Z. Li and R. Yuan, *Anal. Chem.*, 2020, **92**, 14723-14729.
